# Supplementary material for: Ternary alkali ion thiogallates, A5GaS4 (A = Li and Na), with isolated tetrahedral building units and their ionic conductivities
Source: Royal Society of Chemistry journal article supplement (doi:10.1039/d1dt00766a), 2021-01-01
Supplement: d1dt00766a1.pdf [file d1dt00766a1.pdf]

*Supporting Information File*

# Ternary Alkali ion Thiogallates, $A_5\text{GaS}_4$ ( $A = \text{Li}$ and $\text{Na}$ ) with Isolated Tetrahedral Building Units and Their Ionic conductivity

Srikanth Balijapelly,<sup>a</sup> Prashanth Sandineni,<sup>a</sup> Amit Adhikary,<sup>a</sup> Nikolay N. Gerasimchuk,<sup>b</sup> Aleksandr V. Chernatynskiy,<sup>c</sup> Amitava Choudhury<sup>a,\*</sup>

<sup>a</sup>Department of Chemistry, Missouri University of Science and Technology, Rolla, MO 65409,

USA

<sup>b</sup>Department of Chemistry, Missouri State University, Springfield, MO 65897, USA

<sup>c</sup>Department of Physics, Missouri University of Science and Technology, Rolla, MO 65409, USA

| <b>SI No</b>     | <b>Content</b>                                                                                                                                                  | <b>Page No</b> |
|------------------|-----------------------------------------------------------------------------------------------------------------------------------------------------------------|----------------|
| <b>Table S1</b>  | Atomic coordinates and isotropic thermal displacement parameters for compounds $\text{Li}_5\text{GaS}_4$ ( <b>I</b> ) & $\text{Na}_5\text{GaS}_4$ ( <b>II</b> ) | 3              |
| <b>Table S2</b>  | Anisotropic thermal displacement parameters for compounds $\text{Li}_5\text{GaS}_4$ ( <b>I</b> ) & $\text{Na}_5\text{GaS}_4$ ( <b>II</b> )                      | 4              |
| <b>Figure S1</b> | PXRD patterns comparison of $\text{Li}_5\text{GaS}_4$ , sealed tube reaction and $\text{LiGaS}_2$                                                               | 5              |
| <b>Figure S2</b> | Photographs of the as synthesized crystals of compounds $\text{Li}_5\text{GaS}_4$ ( <b>I</b> ) and $\text{Na}_5\text{GaS}_4$ ( <b>II</b> ).                     | 6              |
| <b>Figure S3</b> | TGA & DSC plots for compounds $\text{Li}_5\text{GaS}_4$ ( <b>I</b> ) & $\text{Na}_5\text{GaS}_4$ ( <b>II</b> )                                                  | 7              |
| <b>Figure S4</b> | Comparison of PXRDs of <b>I</b> and <b>II</b> before and after simultaneous TGA & DSC.                                                                          | 8              |
| <b>Figure S5</b> | Li coordination in $\text{Li}_5\text{GaS}_4$ ( <b>I</b> )                                                                                                       | 9              |
| <b>Figure S6</b> | Na coordination in $\text{Na}_5\text{GaS}_4$ ( <b>II</b> )                                                                                                      | 10             |
| <b>Figure S7</b> | Equivalent circuit and parameters used for fitting impedance data                                                                                               | 11             |

Table S1. Final atomic coordinates and equivalent isotropic displacement parameters of the atoms for compounds **I** and **II**.  $U_{\text{(eq)}} = 1/3^{\text{rd}}$  of the trace of the orthogonalized  $U_{\text{eq}}$  tensor.

| Atomic Parameters                        |         |           |        |        |        |                      |
|------------------------------------------|---------|-----------|--------|--------|--------|----------------------|
| Atom                                     | Wyckoff | Occupancy | x/a    | y/b    | z/c    | U [ $\text{\AA}^2$ ] |
| <b>Li<sub>5</sub>GaS<sub>4</sub> (I)</b> |         |           |        |        |        |                      |
| Ga1                                      | 2e      | 1         | 0.6335 | 0.25   | 0.1709 | 0.0166               |
| S1                                       | 4f      | 1         | 0.7577 | 0.015  | 0.3271 | 0.0173               |
| S2                                       | 2e      | 1         | 0.2704 | 0.25   | 0.1751 | 0.0159               |
| S3                                       | 2e      | 1         | 2418   | 0.75   | 0.138  | 0.0167               |
| Li1                                      | 4f      | 1         | 0.3577 | 0.5133 | 0.3341 | 0.0247               |
| Li2                                      | 2e      | 1         | 0.0114 | 0.25   | 0.4846 | 0.0240               |
| Li3                                      | 2e      | 1         | 0.649  | 0.75   | 0.1663 | 0.0280               |
| Li4                                      | 2a      | 1         | 0      | 0      | 0      | 0.0420               |
| <b>Na<sub>5</sub>GaS<sub>4</sub>(II)</b> |         |           |        |        |        |                      |
| Ga1                                      | 8c      | 1         | 0.4597 | 0.1673 | 0.3742 | 0.01148              |
| S1                                       | 8c      | 1         | 0.13   | 0.7947 | 0.4575 | 0.0157               |
| S2                                       | 8c      | 1         | 0.4452 | 0.8445 | 0.3782 | 0.0152               |
| S3                                       | 8c      | 1         | 0.3574 | 0.7477 | 0.6238 | 0.0157               |
| S4                                       | 8c      | 1         | 0.3696 | 0.261  | 0.2861 | 0.0163               |
| Na1                                      | 8c      | 1         | 0.3508 | 0.9054 | 0.499  | 0.0261               |
| Na2                                      | 8c      | 1         | 0.2852 | 0.55   | 0.3645 | 0.0197               |
| Na3                                      | 8c      | 1         | 0.5553 | 0.5599 | 0.4342 | 0.0264               |
| Na4                                      | 8c      | 1         | 0.4109 | 0.8763 | 0.2489 | 0.0272               |
| Na5                                      | 8c      | 1         | 0.661  | 0.8877 | 0.3313 | 0.0234               |

Table S2. Anisotropic displacement parameters ( $\text{\AA}^2 \times 10^3$ ) for *sad*. The anisotropic displacement factor exponent takes the form:  $-2p^2[h^2a^*2U^{11} + \dots + 2hk a^* b^* U^{12}]$

| Atoms                                     | $U^{11}$ | $U^{22}$ | $U^{33}$ | $U^{23}$ | $U^{13}$ | $U^{12}$ |
|-------------------------------------------|----------|----------|----------|----------|----------|----------|
| <b>Li<sub>5</sub>GaS<sub>4</sub> (I)</b>  |          |          |          |          |          |          |
| Ga(1)                                     | 16(1)    | 15(1)    | 18(1)    | 0        | 0(1)     | 0        |
| S(1)                                      | 18(1)    | 16(1)    | 18(1)    | 1(1)     | -1(1)    | 1(1)     |
| S(2)                                      | 14(1)    | 14(1)    | 19(1)    | 0        | 1(1)     | 0        |
| S(3)                                      | 18(1)    | 15(1)    | 17(1)    | 0        | 1(1)     | 0        |
| Li(1)                                     | 36(5)    | 20(4)    | 18(4)    | -2(3)    | -2(4)    | 3(3)     |
| Li(2)                                     | 16(5)    | 23(6)    | 33(7)    | 0        | -1(4)    | 0        |
| Li(4)                                     | 25(6)    | 55(10)   | 45(9)    | 5(6)     | 13(6)    | 13(6)    |
| Li(3)                                     | 48(8)    | 27(7)    | 10(5)    | 0        | -3(5)    | 0        |
| <b>Na<sub>5</sub>GaS<sub>4</sub> (II)</b> |          |          |          |          |          |          |
| Ga(1)                                     | 8(1)     | 11(1)    | 11(1)    | 0(1)     | 0(1)     | 0(1)     |
| S(1)                                      | 15(1)    | 16(1)    | 12(1)    | -2(1)    | -2(1)    | -1(1)    |
| S(2)                                      | 13(1)    | 11(1)    | 17(1)    | 1(1)     | 0(1)     | 0(1)     |
| S(3)                                      | 9(1)     | 18(1)    | 16(1)    | -1(1)    | 1(1)     | -2(1)    |
| S(4)                                      | 15(1)    | 17(1)    | 12(1)    | 2(1)     | 0(1)     | 2(1)     |
| Na(1)                                     | 27(1)    | 28(1)    | 19(1)    | 5(1)     | 0(1)     | -3(1)    |
| Na(2)                                     | 14(1)    | 17(1)    | 24(1)    | 1(1)     | -2(1)    | 2(1)     |
| Na(3)                                     | 34(1)    | 18(1)    | 21(1)    | -3(1)    | -9(1)    | 6(1)     |
| Na(4)                                     | 26(1)    | 33(1)    | 18(1)    | -9(1)    | -5(1)    | 8(1)     |
| Na(5)                                     | 13(1)    | 29(1)    | 22(1)    | -8(1)    | -3(1)    | 5(1)     |

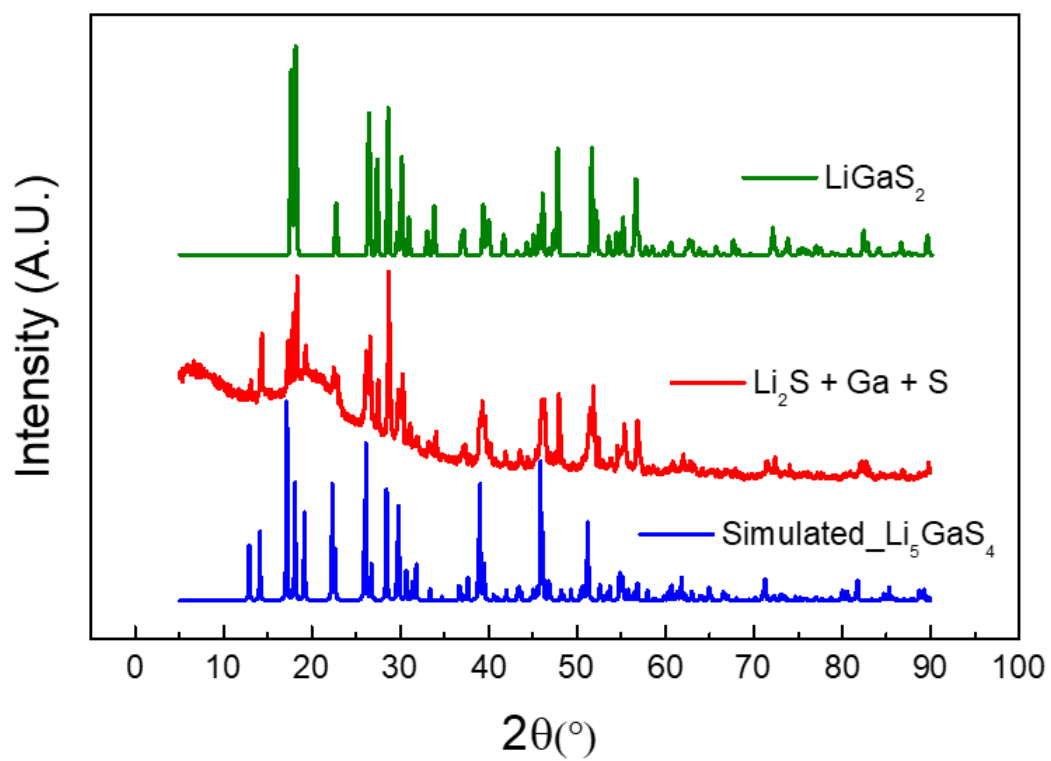

Figure S1: PXRD comparison of product from sealed tube reaction with simulated pattern of  $\text{Li}_5\text{GaS}_4$  and the simulated pattern of the secondary phase  $\text{LiGaS}_2$ .

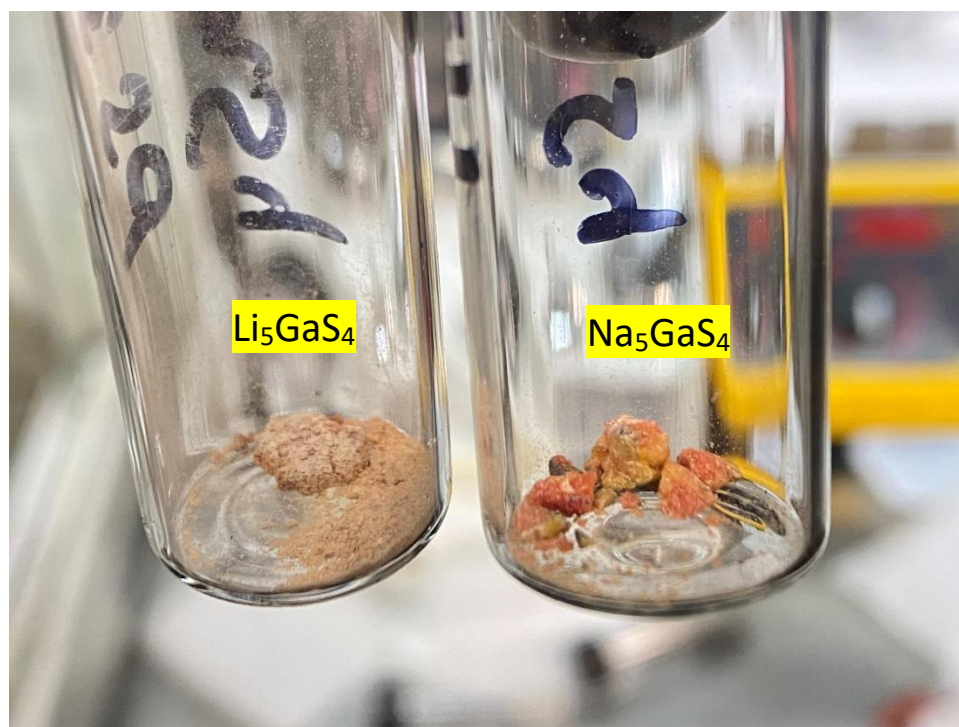

Figure S2: Photographs of the as synthesized crystals of compounds  $\text{Li}_5\text{GaS}_4$  (**I**) and  $\text{Na}_5\text{GaS}_4$  (**II**).

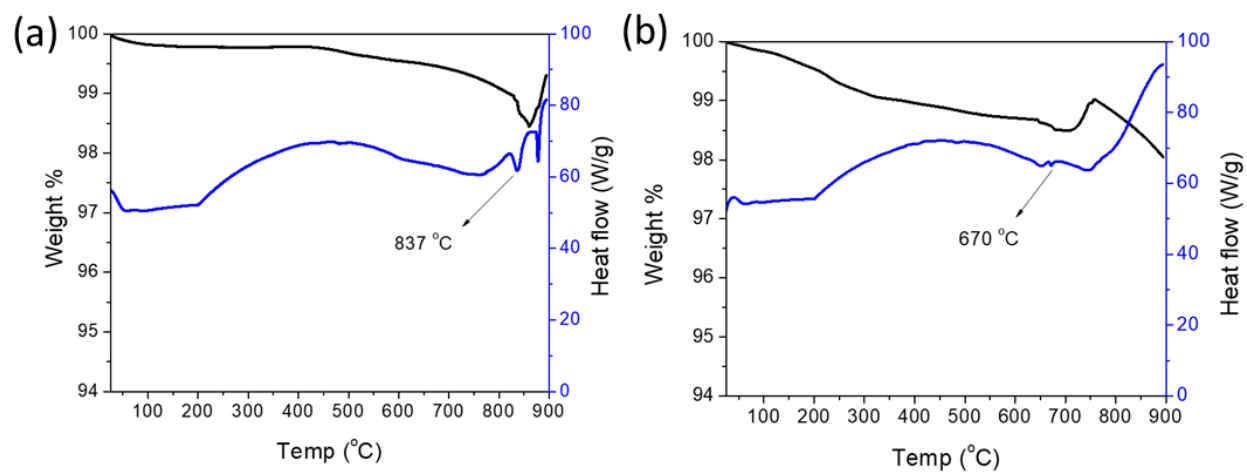

Figure S3: TGA and DSC plots of (a) compound **I**,  $\text{Li}_5\text{GaS}_4$  and (b) compound **II**,  $\text{Na}_5\text{GaS}_4$ .

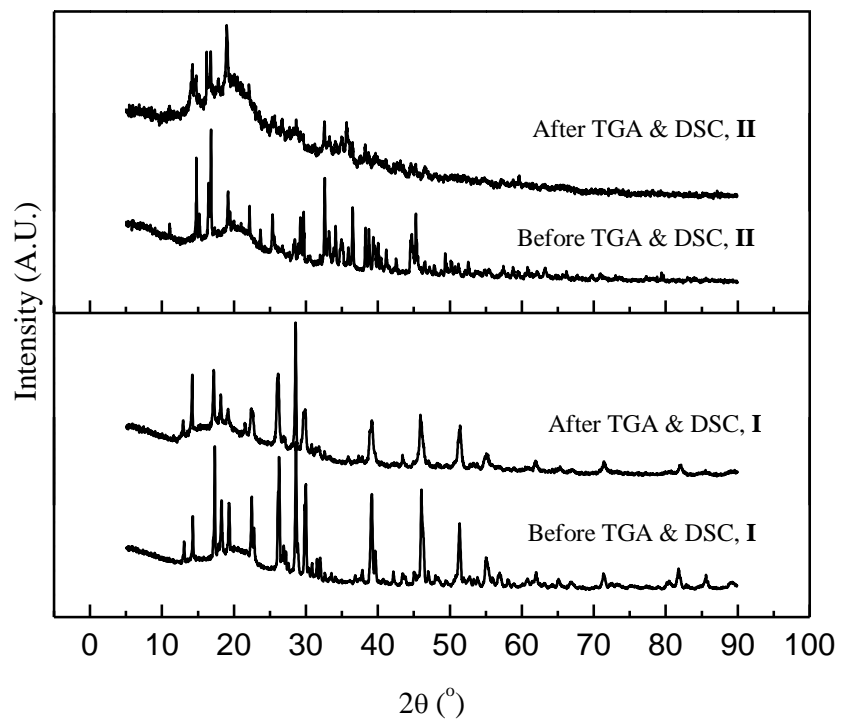

Figure S4: Comparison of PXRDs of **I** and **II** before and after simultaneous TGA & DSC.



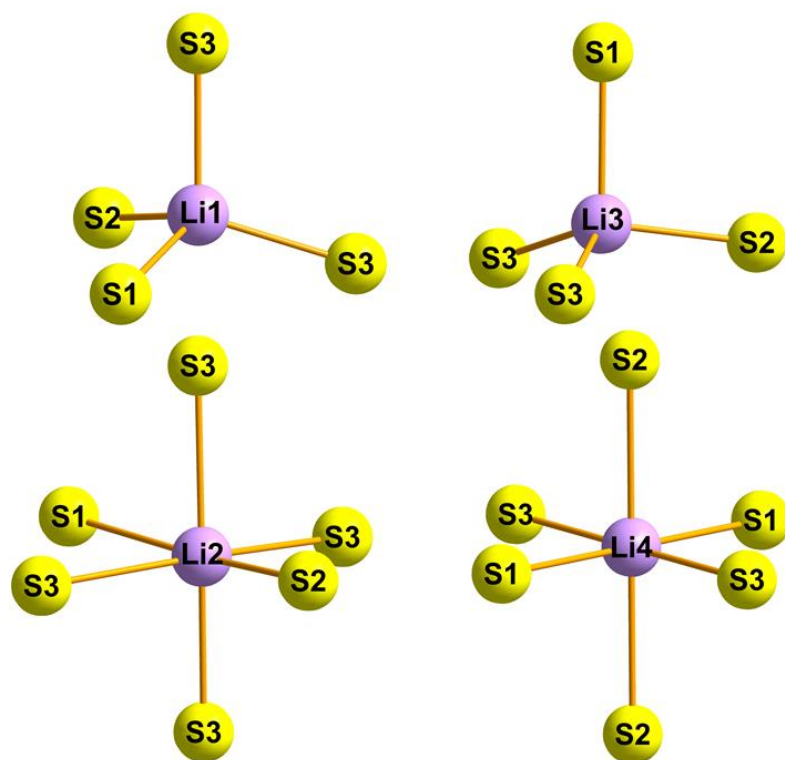

Figure S5: Coordination environment of Li atoms in  $\text{Li}_5\text{GaS}_4$  (I).

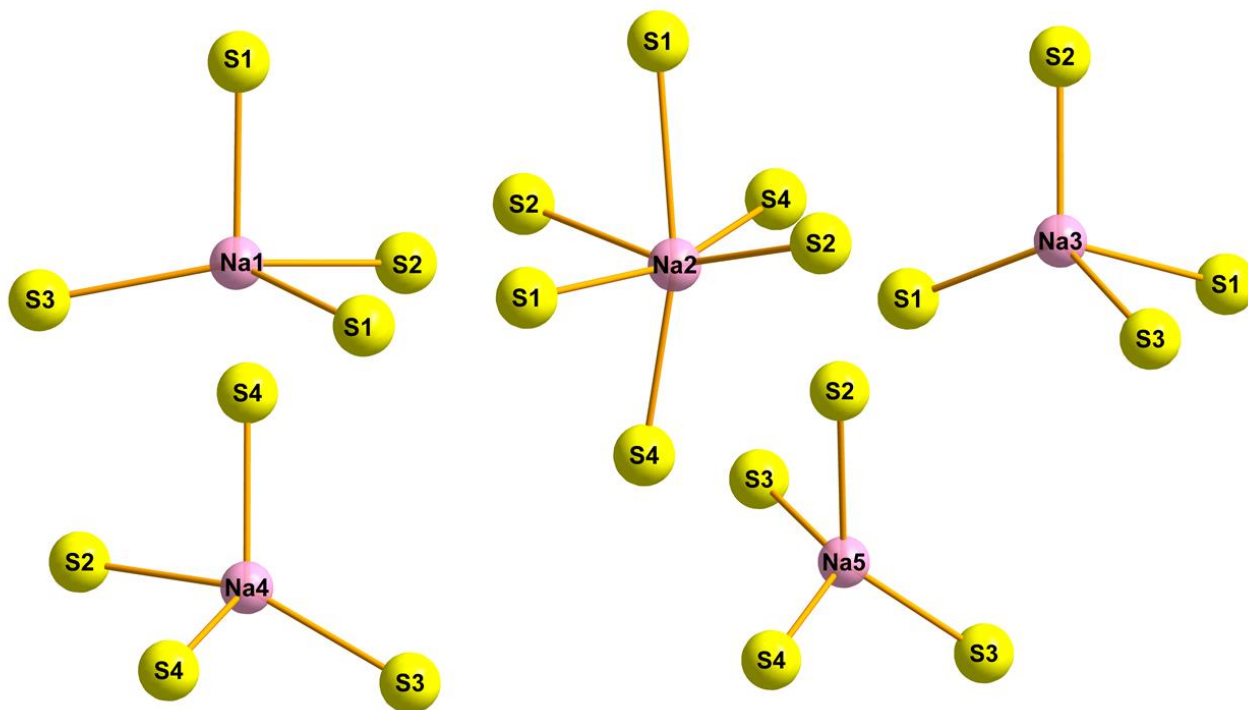

Figure S6: Coordination environment of Na atoms in  $\text{Na}_5\text{GaS}_4$  (II).

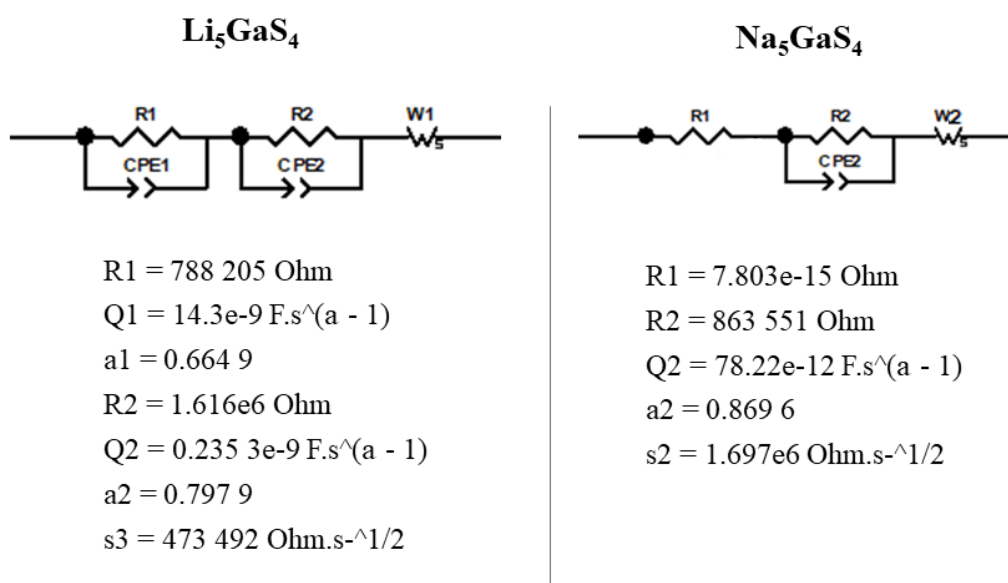

Figure S7: Equivalent circuit and the parameters used to fit the impedance data for Li<sub>5</sub>GaS<sub>4</sub> (I) and Na<sub>5</sub>GaS<sub>4</sub> (II).
